# Supplementary material for: HONH3Cl optimized CH3NH3PbI3 films for improving performance of planar heterojunction perovskite solar cells via a one-step route
Source: Royal Society of Chemistry journal article supplement (doi:10.1039/c6cp05006a), 2016-01-01
Supplement: c6cp05006a1.pdf [file c6cp05006a1.pdf]

## Electronic Supplementary Information for

### **HONH<sub>3</sub>Cl optimized CH<sub>3</sub>NH<sub>3</sub>PbI<sub>3</sub> films for improving performance of planar heterojunction perovskite solar cells via One-step route**

Guo-hua Dong,<sup>‡ab</sup> Teng-ling Ye,<sup>‡a</sup> Bo-yu Pang,<sup>c</sup> Yu-lin Yang,<sup>\*a</sup> Li Sheng,<sup>a</sup> Yan Shi,<sup>a</sup> Rui-qing Fan,<sup>\*a</sup> Li-guo Wei<sup>a</sup> and Ting Su<sup>a</sup>

<sup>a</sup> MIIT Key Laboratory of Critical Materials Technology for New Energy Conversion and Storage, School of Chemistry and Chemical Engineering, Harbin Institute of Technology, Harbin 150001, P. R. China. E-mail: ylyang@hit.edu.cn and fanruiqing@hit.edu.cn; Fax: +86-451-86418270.

<sup>b</sup> College of Chemistry and Chemical Engineering, Qiqihar University, Qiqihar 161006, P. R. China.

<sup>c</sup> No 4 High School of Xiang Yang, Hubei 441021, P.R. China.

#### **Corresponding Author**

\*E-mail: ylyang@hit.edu.cn

\*E-mail: fanruiqing@hit.edu

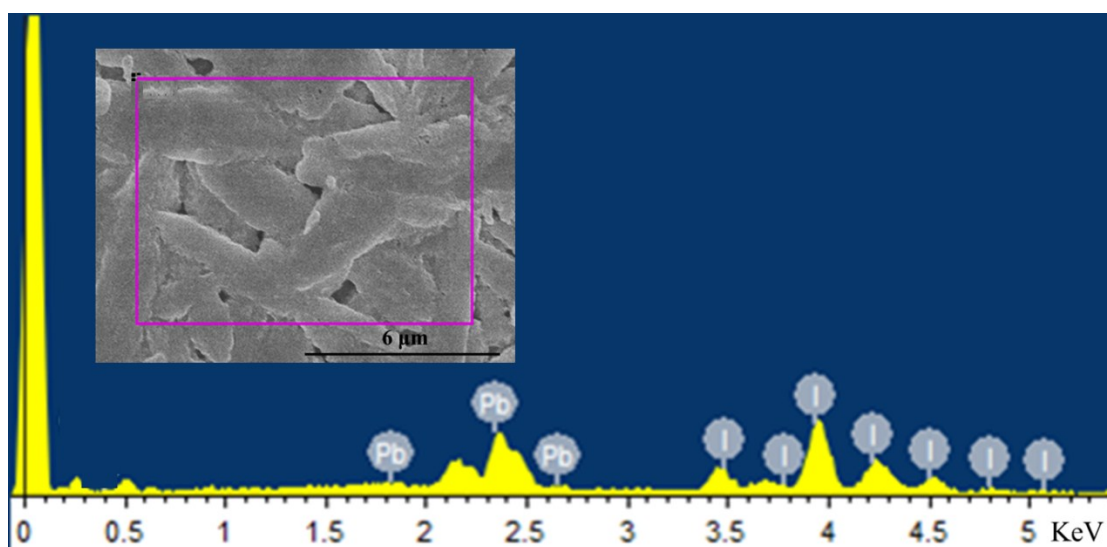

**Fig S1.** Energy dispersive spectrum (EDS) of the 1:1:0.1 HONH<sub>3</sub>Cl-induced perovskite film. Inset is the SEM images for EDS scanning.

**Table S1.** The element distribution of the 1:1:0.1 HONH<sub>3</sub>Cl-induced perovskite film.

| Element | Weight % | Atom % |
|---------|----------|--------|
| I L     | 65.58    | 74.91  |
| Pb M    | 34.42    | 24.09  |
| Total   | 100.00   |        |
